# Supplementary material for: Morphology control and temporal growth of a continuous silver shell on core–shell spheres
Source: Royal Society of Chemistry journal article supplement (doi:10.1039/c4ce00351a), 2014-01-01
Supplement: c4ce00351a1.pdf [file c4ce00351a1.pdf]

[Electronic Supplementary Information]

## **Morphology control and temporal growth of continuous silver shell on core–shell spheres**

Won Gyun Choe,<sup>a,b</sup> Do Youb Kim<sup>c</sup> and O Ok Park<sup>\*a</sup>

<sup>a</sup> Department of Chemical and Biomolecular Engineering (BK21+ graduate program), Korea Advanced Institute of Science and Technology (KAIST), 291 Daehak-ro, Yuseong-gu, Daejeon 305-701, Republic of Korea,

<sup>b</sup> R&D Center, Korea Minting, Security Printing & ID Card Operating Corp. (KOMSCO), 80-67 Gwahak-ro, Yuseong-gu, Daejeon 305-713, Republic of Korea,

<sup>c</sup> Advanced Materials Division, Korea Research Institute of Chemical Technology (KRICT), 141 Gajeong-ro, Yuseong-gu, Daejeon 305-600, Republic of Korea.

*\*E-mail: oopark@kaist.ac.kr*

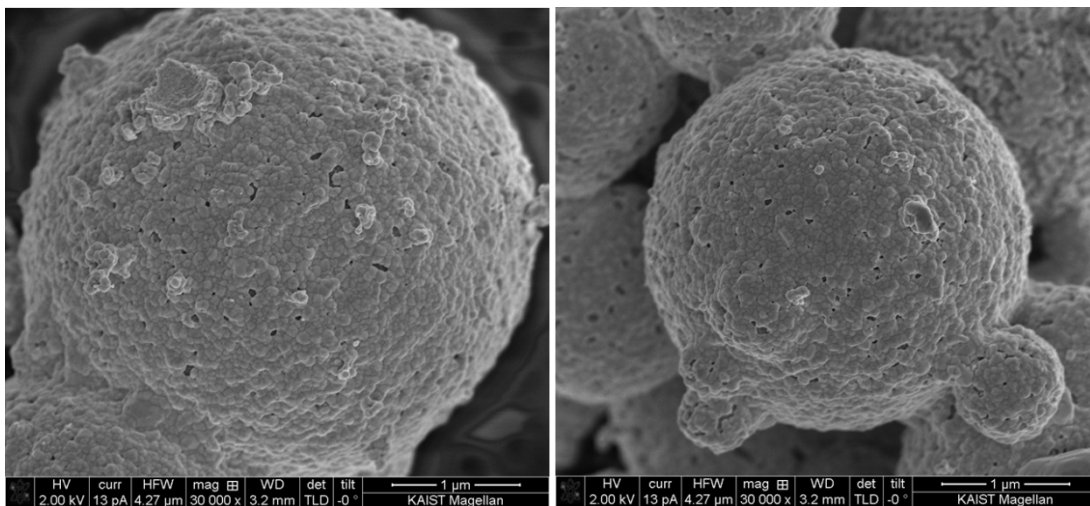

**Fig. S1** SEM images of the Fe@TiO<sub>2</sub>@Ag core-shell spheres obtained in the absence of trisodium citrate. The reaction condition was identical with those shown in Fig. 2a.

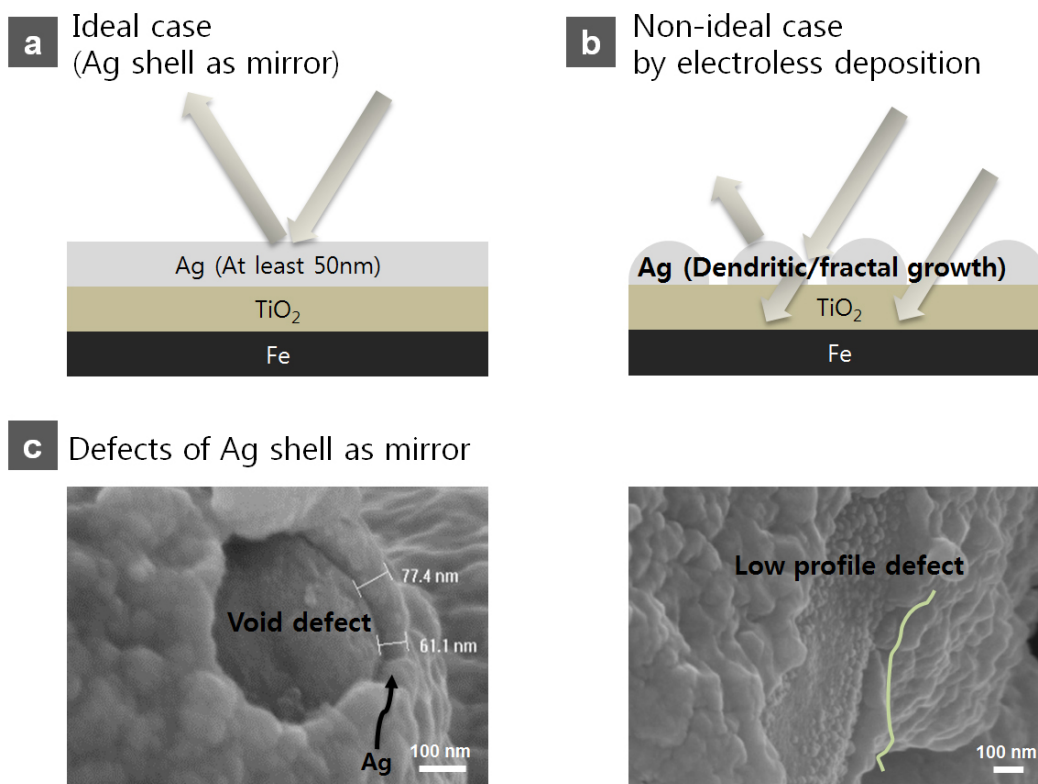

**Fig. S2** Schematic diagram and practical evidence of Ag shell as a mirror: (a) ideal case as a perfect mirror, (b) non-ideal case by electroless deposition leading to low reflectance, and (c) SEM images of typical defects of Ag shell, void defect and low profile defect, respectively.

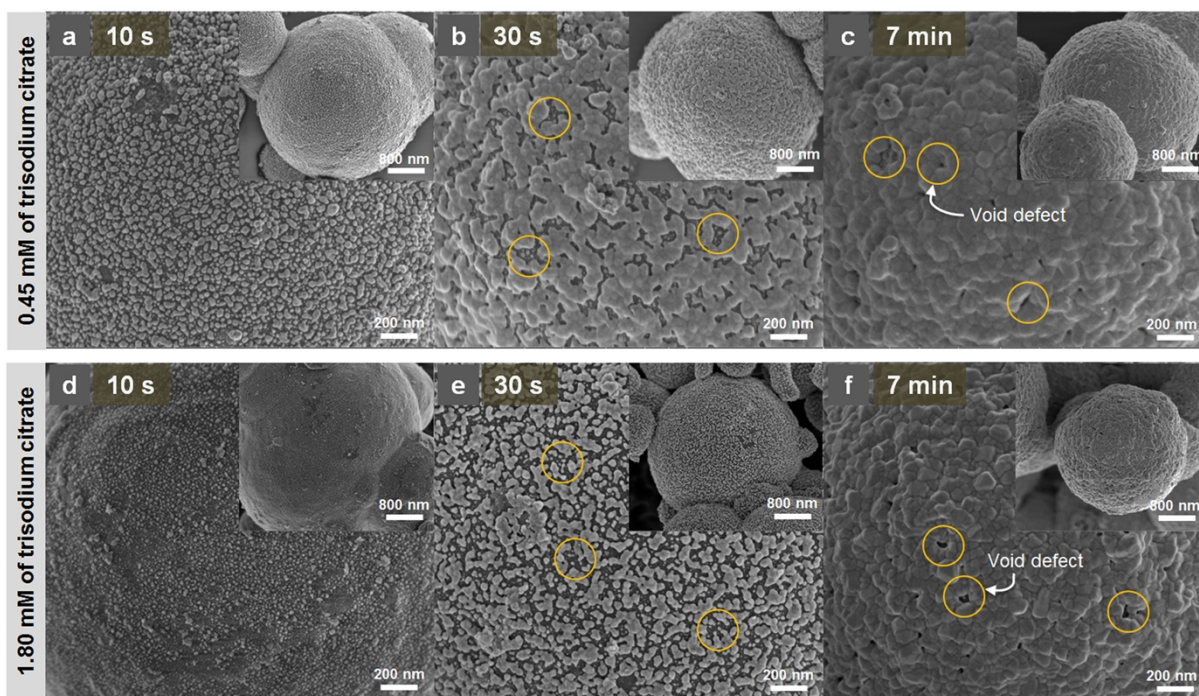

**Fig. S3** SEM images of the Fe@TiO<sub>2</sub>@Ag core-shell spheres showing temporal growth of Ag shell at different concentrations of the trisodium citrate: (a-c) with 0.45 mM of the trisodium citrate, taken at 10 s, 30 s, and 7 min, respectively, (d-f) with 1.80 mM of the trisodium citrate, taken at 10 s, 30 s, and 7 min, respectively. Insets show corresponding low magnification images of each resultant sphere.
